# Supplementary material for: Single-cell RNA sequencing of immune cells in gastric cancer patients
Source: publisher site journal article supplement (doi:10.18632/aging.102774), 2020-02-10
Supplement: Supplementary file [file aging-v12i3-102774-supplementary-material-SD1.pdf]

## SUPPLEMENTARY FIGURES

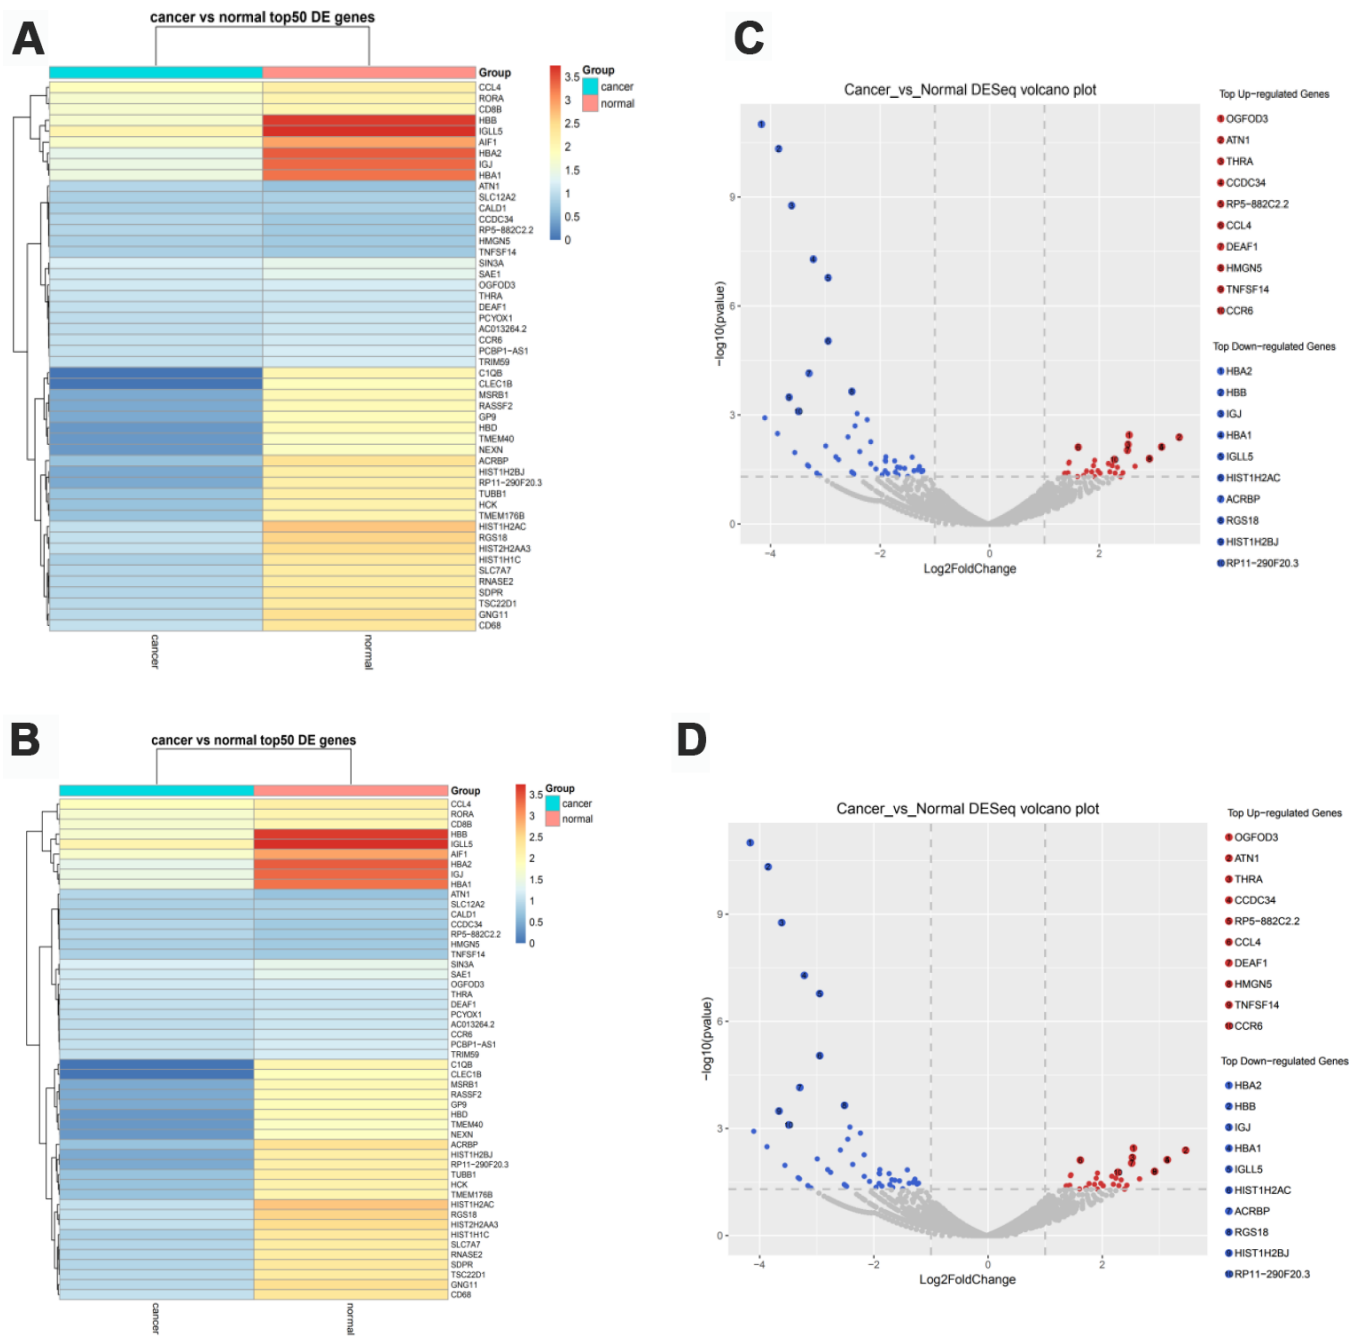

**Supplementary Figure 1. Identification of CD8<sup>+</sup> naive T cells in GC.** (A) Heat map displaying the top 50 different genes in CD8<sup>+</sup> naive T cells in T vs N. (B) Heat map displaying the top 50 different genes in CD8<sup>+</sup> naive T cells in PB vs HB. (C) Volcano plot showing the top 10 upregulated and 10 downregulated genes in CD8<sup>+</sup> naive T cells in T vs N. (D) Volcano plot showing the top 10 upregulated and 10 downregulated genes in CD8<sup>+</sup> naive T cells in PB vs HB.

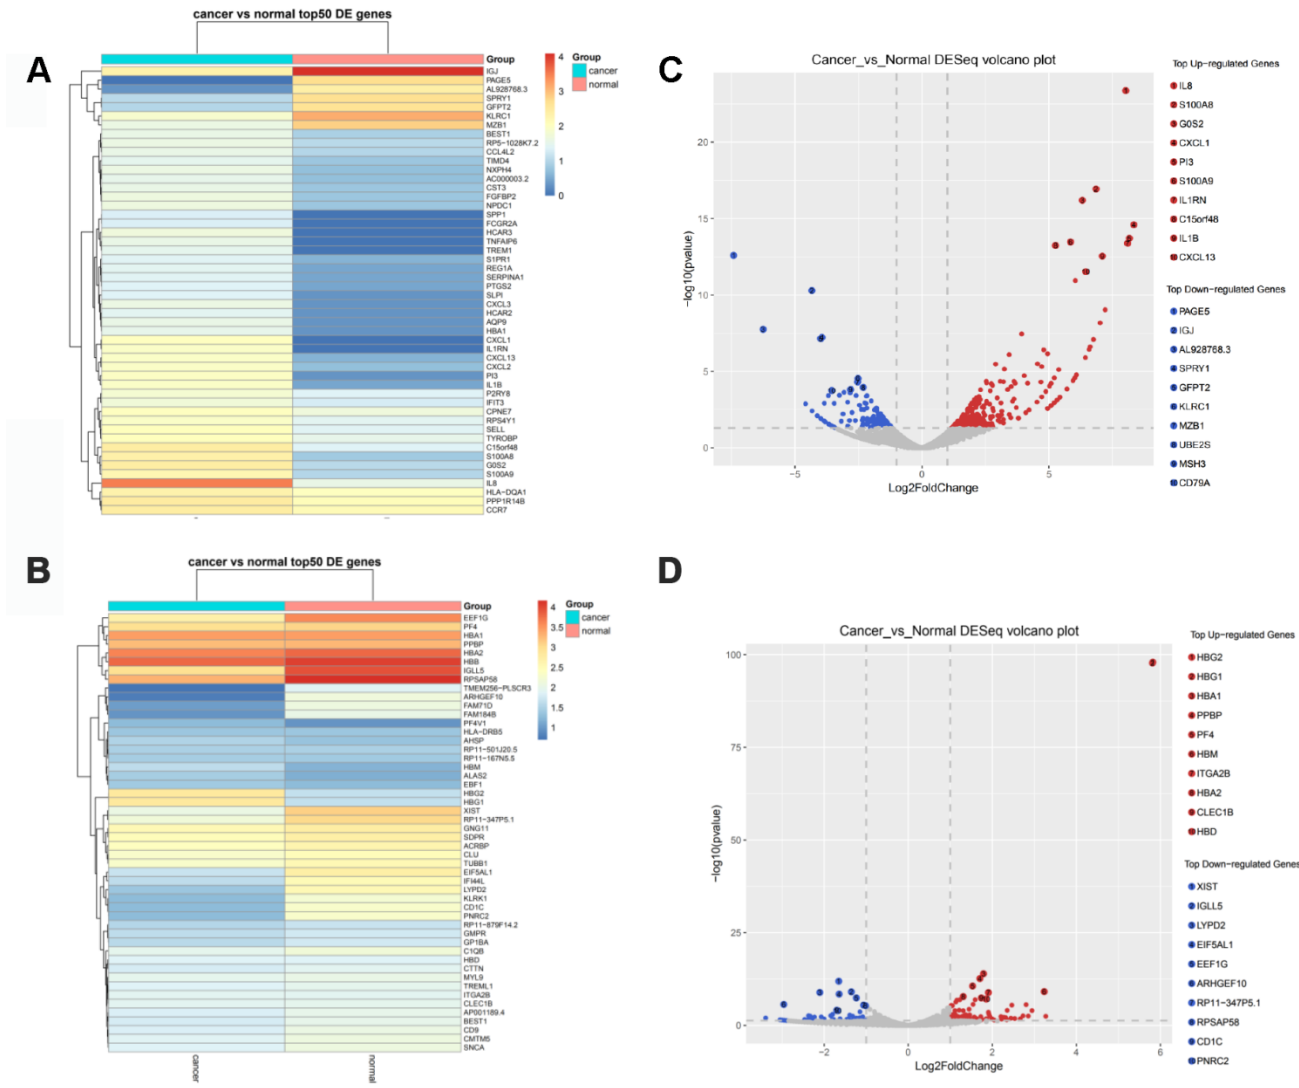

**Supplementary Figure 2. Identification of CD8<sup>+</sup> cytotoxic T cells in GC.** (A) Heat map displaying the top 50 differentially expressed genes in CD8<sup>+</sup> cytotoxic T cells in T vs N. (B) Heat map displaying the top 50 differentially expressed genes in CD8<sup>+</sup> cytotoxic T cells in PB vs HB. (C) Volcano plot showing the top 10 upregulated and 10 downregulated genes in CD8<sup>+</sup> cytotoxic T cells in T vs N. (D) Volcano plot showing the top 10 up-regulated and 10 down-regulated genes in CD8<sup>+</sup> cytotoxic T cells in PB vs HB.

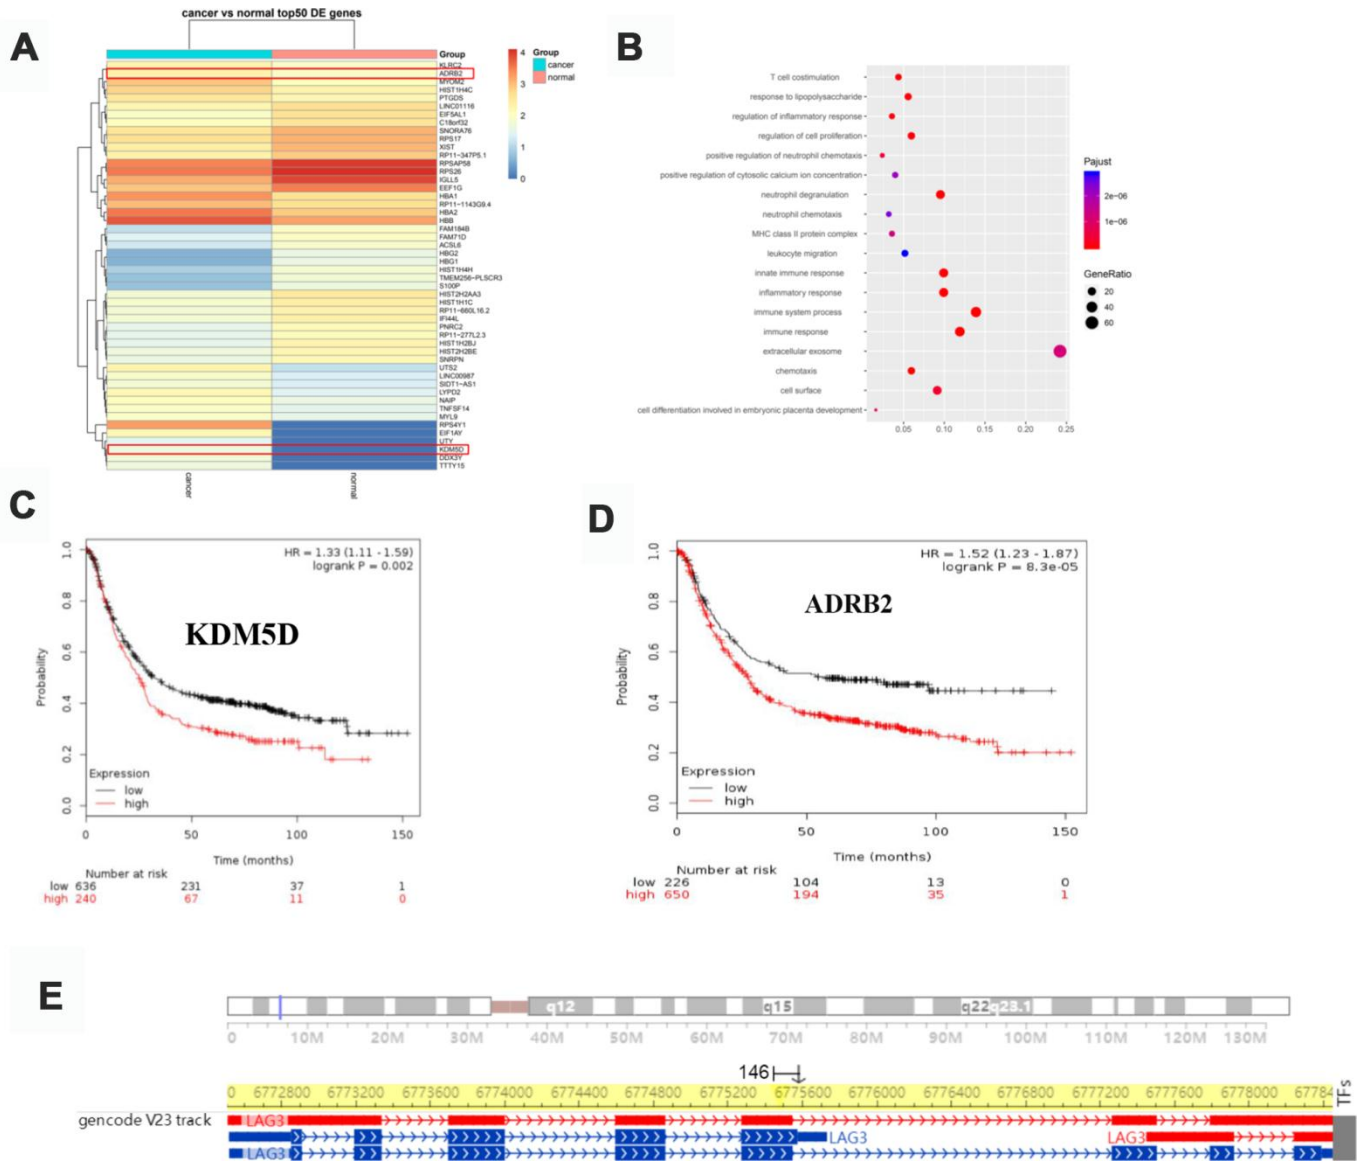

**Supplementary Figure 3. Identification of Tregs in GC blood.** (A) Heat map displaying the top 50 differential genes in Tregs from blood. (B) Pathway analysis for different genes in Tregs. (C and D) KM-plotter database analysis of KDM5D and ADRB2 in GC. (E) RBPJ regulates the locus of LAG3.

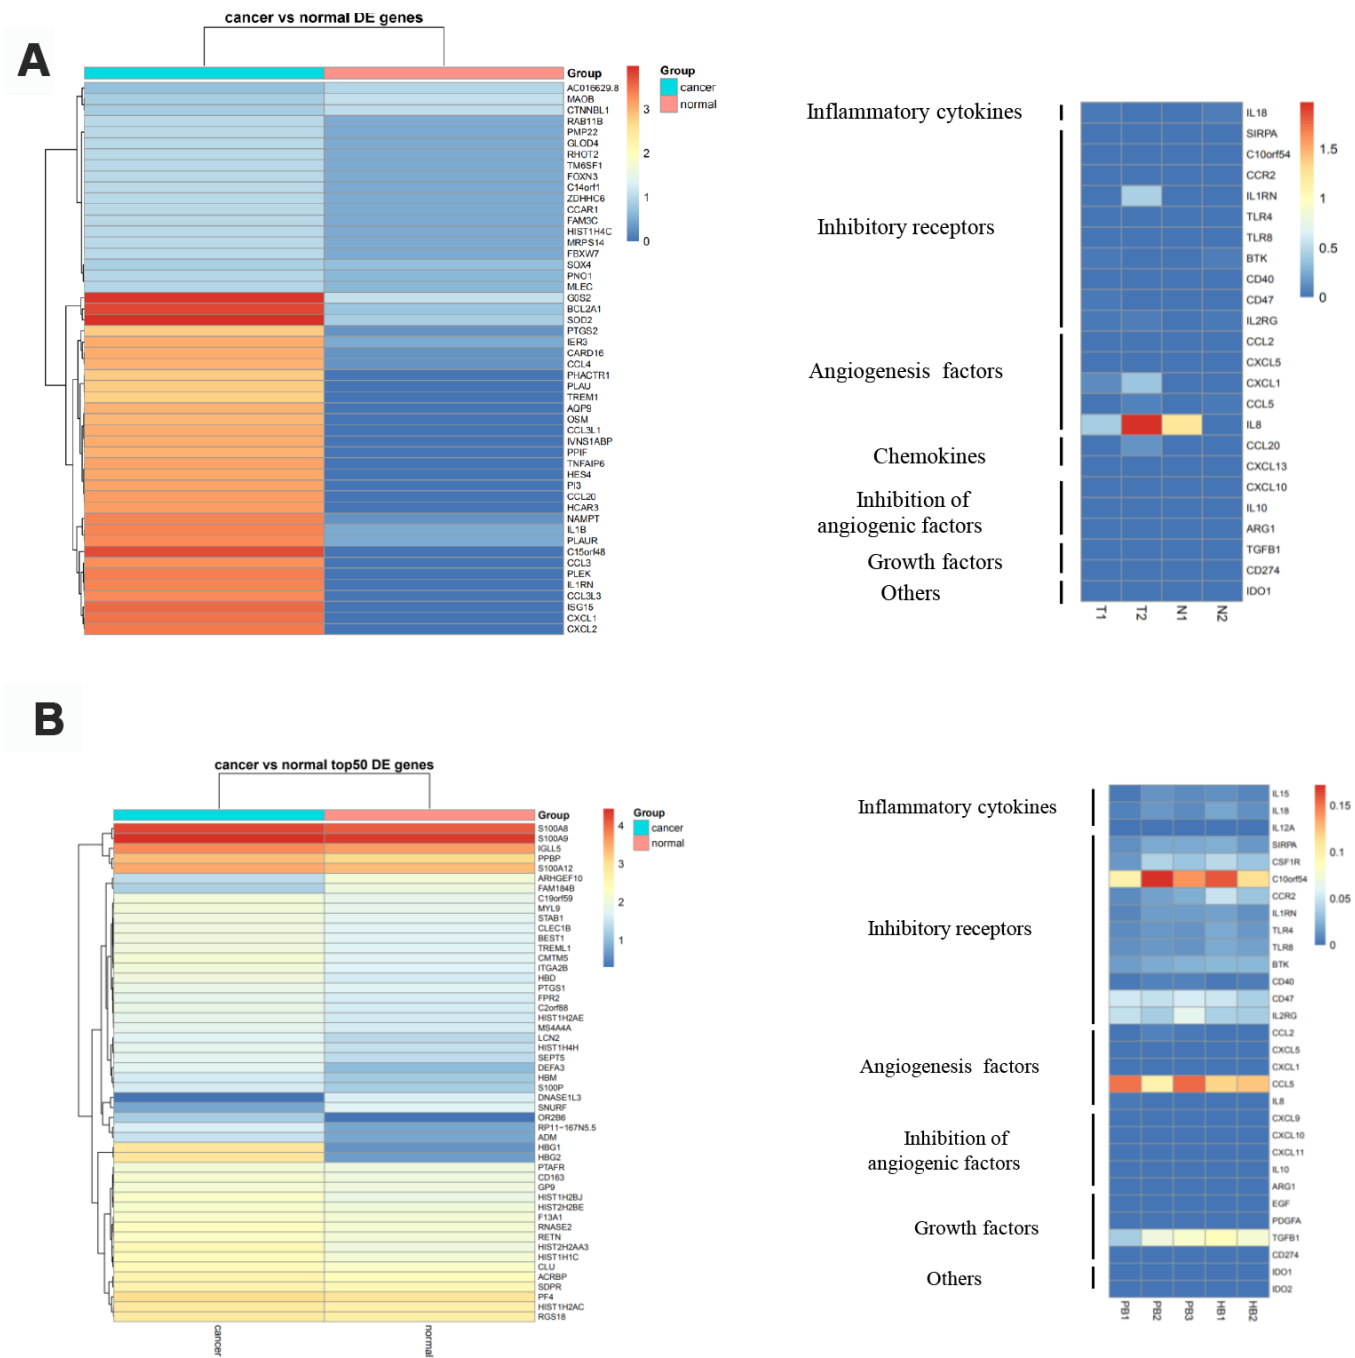

**Supplementary Figure 4. Gene signature of macrophages and pathway analysis. (A)** The expression analysis of functional molecules in macrophages cell cluster in T vs N. **(B)** The expression analysis of functional molecules in macrophages cell cluster in PB vs HB
